# Supplementary material
Source: HighWire-hosted journal article supplement (http://www.cmaj.ca/highwire/filestream/59425/field_highwire_adjunct_files/0/150171-image-1-at.pdf)
Supplement: 150171-image-1-at.pdf [file 150171-image-1-at.pdf]

**Appendix 1 ( as supplied by the authors): Fordyce granules**

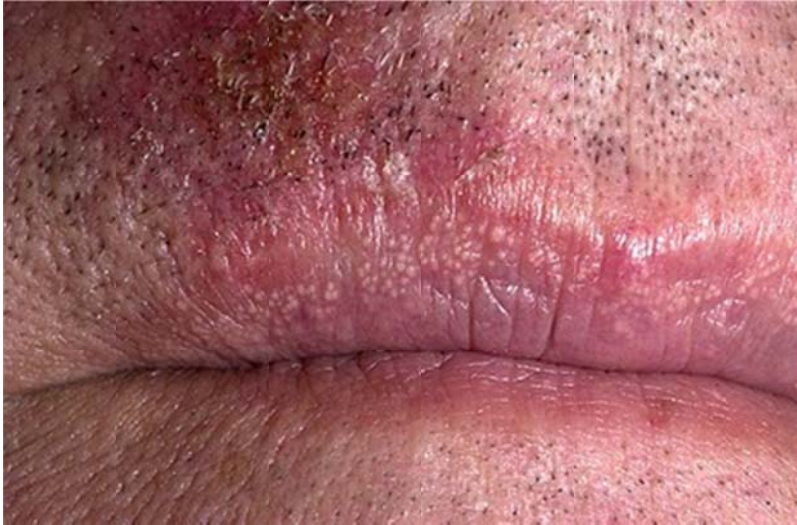

Appendix to: Mintsoulis D, Beecker J. Muir–Torre syndrome. *CMAJ* 20155.DOI:10.1503/cmaj.150171.

Copyright © 2016 The Author(s) or their employer(s).  
To receive this resource in an accessible format, please contact us at [cmajgroup@cmaj.ca](mailto:cmajgroup@cmaj.ca).
